# Supplementary material
Source: PubMed Central journal article supplement (PMC3710193)
Supplement: NIHMS322748-supplement-1.pdf [file NIHMS322748-supplement-1.pdf]

## **Supplementary Data**

### **Supplementary Figure 1. Omit map of $\alpha$ -C-GalCer in mouse CD1d binding cleft.**

Omit map contoured at 1 sigma.  $\alpha$ -C-GalCer, blue; CDR1 $\alpha$ , purple; CDR3 $\alpha$ , yellow; mCD1d, grey.

### **Supplementary Figure 2. Differential affinity binding kinetics of V $\beta$ 8.2 and V $\beta$ 7 to CD1d-Ag.**

Binding of increasing concentrations of V $\beta$ 8.2 TCR to CD1d- $\alpha$ -GalCer (A) or CD1d- $\alpha$ -C-GalCer (B). Binding of V $\beta$ 7 TCR to CD1d- $\alpha$ -GalCer (C) or CD1d- $\alpha$ -C-GalCer (D).

All results are shown as one representative experiment of two.

### **Supplementary Table 1**

Data collection and refinement statistics

**Supplementary Table 1 Data collection and refinement statistics**

| <b>mV<math>\alpha</math>14V<math>\beta</math>8.2TCR-CD1d-<math>\alpha</math>-C-GalCer</b> |                                               |
|-------------------------------------------------------------------------------------------|-----------------------------------------------|
| <b>Data collection</b>                                                                    |                                               |
| Temperature                                                                               | 100K                                          |
| Resolution limits (Å)                                                                     | 50-3.2 (3.37-3.20)                            |
| Space Group                                                                               | P2 <sub>1</sub> 2 <sub>1</sub> 2 <sub>1</sub> |
| Cell dimensions (Å)                                                                       | $a=59.17, b=86.37, c=236.40$                  |
| Total N <sup>o</sup> . observations                                                       | 168608                                        |
| N <sup>o</sup> . unique observations                                                      | 20725                                         |
| Multiplicity                                                                              | 8.1 (9.8)                                     |
| Data completeness                                                                         | 100 (100)                                     |
| I/ $\sigma$ <sub>1</sub>                                                                  | 7.2 (2.2)                                     |
| R <sub>p.i.m</sub> <sup>1</sup> (%)                                                       | 9.8 (37.7)                                    |
| <b>Refinement statistics</b>                                                              |                                               |
| R <sub>factor</sub> <sup>2</sup> (%)                                                      | 22.6                                          |
| R <sub>free</sub> <sup>3</sup> (%)                                                        | 28.9                                          |
| Non hydrogen atoms <sup>4</sup>                                                           |                                               |
| - protein                                                                                 | 6587                                          |
| - lipid                                                                                   | 60                                            |
| - other                                                                                   | 56                                            |
| Ramachandran plot                                                                         |                                               |
| - Most favoured                                                                           | 88.4                                          |
| - Allowed region (%)                                                                      | 11.3                                          |
| - Generously allowed region (%)                                                           | 0.3%                                          |
| B-factors (Å <sup>2</sup> )                                                               |                                               |
| - Average main chain                                                                      | 80.5                                          |
| - Average side chain                                                                      | 82.0                                          |
| - $\alpha$ -GalCer                                                                        | 76.1                                          |
| rmsd bonds (Å)                                                                            | 0.007                                         |
| rmsd angles (°)                                                                           | 1.007                                         |

$$^1 R_{p.i.m} = \sum_{hkl} [1/(N-1)]^{1/2} \sum_i |I_{hkl,i} - \langle I_{hkl} \rangle| / \sum_{hkl} \langle I_{hkl} \rangle$$

$$^2 R_{factor} = (\sum | |F_o| - |F_c| | ) / (\sum |F_o| ) - \text{for all data except as indicated in footnote 3.}$$

<sup>3</sup> 5% of data was used for the R<sub>free</sub> calculation

Values in parentheses refer to the highest resolution bin.

<sup>4</sup>The residues that could not be modelled in the structures were CD1d: residues 1-6, 300-302;  $\beta_2m$ : residue 1; TCR  $\alpha$  chain: residues 1, 135-135, 209-210; TCR  $\beta$  chain: residues 1-2, CDR3 $\beta$  loop 96-102.

SUPPLEMENTARY FIGURE 1

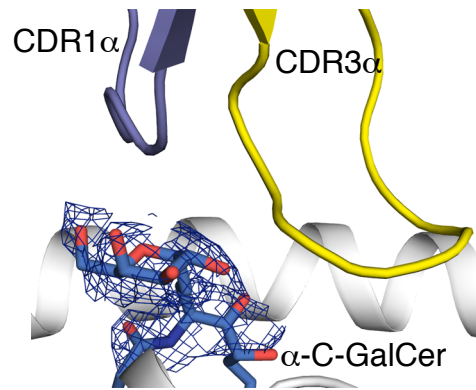

**A**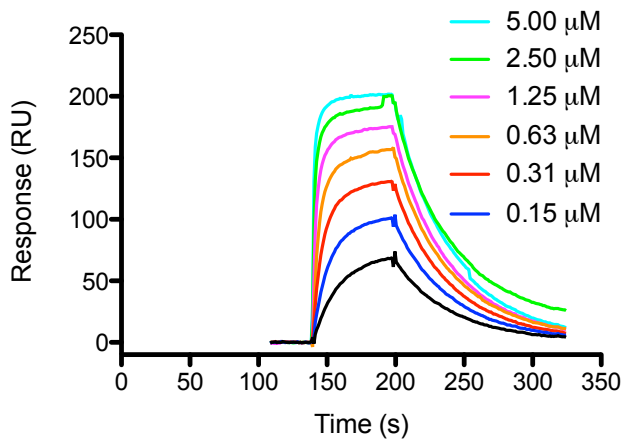**B**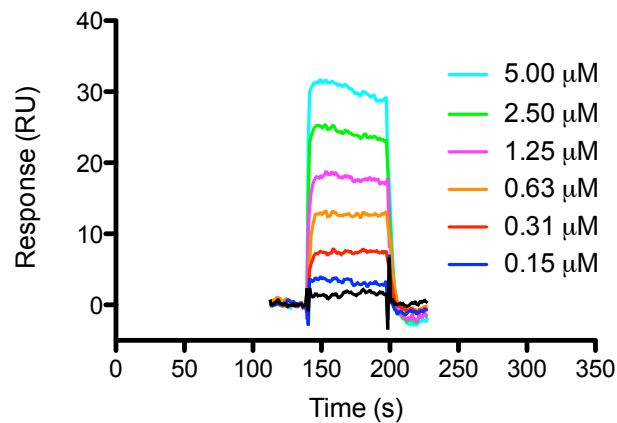**C**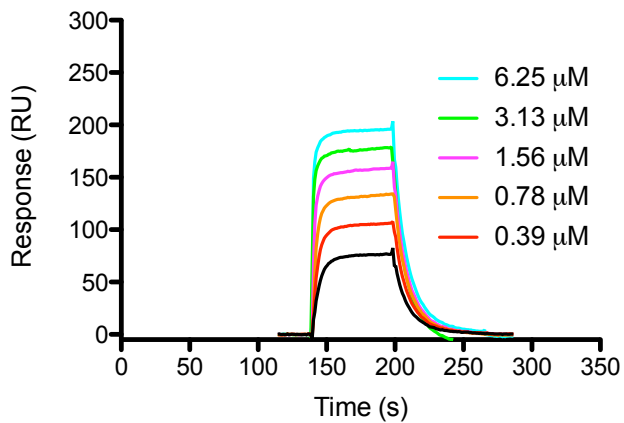**D**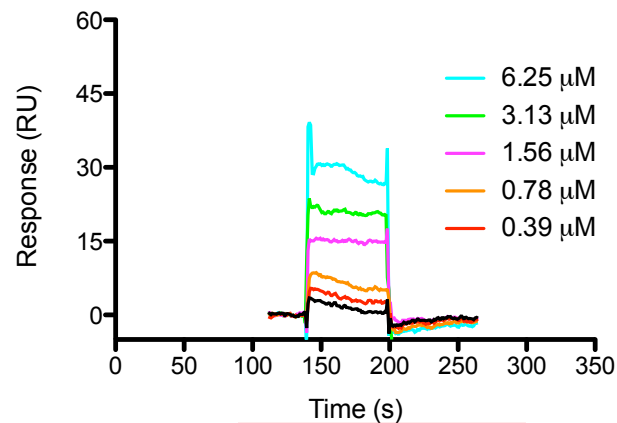**Supp. Fig. 2**
